# Supplementary material for: Cognitive Performance Enhancement Induced by Caffeine, Carbohydrate and Guarana Mouth Rinsing during Submaximal Exercise
Source: MDPI journal article supplement (doi:10.3390/nu9060589), 2017-06-09
Supplement: s1 [file s1]

| Duration Production Task    |     |          |                  |                 | Simon Task             |               |                |              |           |            |                |           |
|-----------------------------|-----|----------|------------------|-----------------|------------------------|---------------|----------------|--------------|-----------|------------|----------------|-----------|
| mean (standard errors)      |     |          |                  |                 | mean (standard errors) |               |                |              |           |            |                |           |
| Produced                    |     |          |                  |                 |                        |               |                |              |           |            |                |           |
|                             |     | Duration | Variance         | Reaction Time   |                        |               |                | Errors       |           |            |                |           |
|                             |     | (ms)     | (ms)             | (ms)            |                        |               |                | (% )         |           |            |                |           |
|                             |     |          |                  | CO              | IN                     | Total         | Simon Effect § | CO           | IN        | Total      | Simon Effect § |           |
| Nutritional supplementation | PL  | Block 1  | 1370.7 (50.9)    | 197.9 (17.5)    | 336.0 (8.7)            | 365.5 (9.7)   | 350.7 (6.8)    | 29.4 (5.7)   | 4.7 (0.8) | 9.8 (1.2)  | 7.2 (0.8)      | 5.1 (1.2) |
|                             |     | Block 2  | 1313.3 (56.8)    | 201.4 (24.0)    | 334.3 (7.3)            | 359.8 (9.0)   | 347.1 (6.0)    | 25.5 (5.1)   | 4.3 (0.9) | 8.9 (1.3)  | 6.6 (0.9)      | 4.6 (1.3) |
|                             |     | Block 3  | 1312.7 (58.6)    | 185.6 (15.9)    | 323.9 (7.7)            | 357.6 (7.9)   | 340.8 (6.0)    | 33.7 (3.7)   | 4.6 (0.6) | 8.7 (1.2)  | 6.6 (0.7)      | 4.2 (1.5) |
|                             |     | Total    | 1332.2 (31.8)    | 195.0 (11.1)    | 331.4 (4.6) ●          | 361.1 (5.1) ● | 346.2 (3.6)    | 29.5 (2.8) ● | 4.5 (0.4) | 9.1 (0.7)  | 6.8 (0.5)      | 4.6 (0.8) |
|                             | CHO | Block 1  | 1348.9 (44.2)    | 186.8 (14.5)    | 334.7 (8.1)            | 362.2 (8.0)   | 348.4 (6)      | 27.5 (6.3)   | 7.0 (1.5) | 10.4 (1.7) | 8.7 (1.2)      | 3.4 (2.6) |
|                             |     | Block 2  | 1259.2 (41.0)    | 171.6 (14.6)    | 334.4 (8.4)            | 361.8 (8.5)   | 348.1 (6.1)    | 27.5 (5.5)   | 3.3 (0.8) | 9.5 (0.9)  | 6.4 (0.8)      | 6.3 (1.0) |
|                             |     | Block 3  | 1249.6 (39.4)    | 161.5 (11.8)    | 324.2 (8.0)            | 356.5 (8.1)   | 354.6 (6.1)    | 32.3 (5.5)   | 4.4 (0.9) | 9.8 (1.1)  | 7.1 (0.8)      | 5.3 (1.2) |
|                             |     | Total    | 1285.9 (24.3) ■  | 173.3 (7.9) ■ ▲ | 331.1 (4.7) ●          | 360.2 (4.7)   | 345.6 (3.5)    | 29.1 (3.3) ● | 4.9 (0.7) | 9.9 (0.7)  | 7.4 (0.5)      | 5.0 (1.0) |
|                             | CAF | Block 1  | 1292.6 (24.5)    | 187.0 (11.8)    | 338.0 (8.5)            | 364.4 (8.9)   | 351.2 (6.3)    | 26.4 (5.12)  | 5.1 (0.9) | 10.3 (1.3) | 7.7 (0.9)      | 5.2 (1.6) |
|                             |     | Block 2  | 1255.9 (39.1)    | 187.3 (14.3)    | 336.8 (8.0)            | 360.7 (6.7)   | 348.8 (5.5)    | 23.9 (4.6)   | 3.9 (0.9) | 10.5 (1.4) | 7.2 (0.9)      | 6.6 (1.6) |
|                             |     | Block 3  | 1249.0 (31.5)    | 167.7 (11.5)    | 328.4 (7.4)            | 352.4 (7.4)   | 340.4 (5.5)    | 24 (4.7)     | 4.6 (0.8) | 8.5 (1.4)  | 6.5 (0.9)      | 3.9 (1.7) |
|                             |     | Total    | 1265.8 (18.5) ■  | 180.7 (7.3) ■   | 334.4 (4.6)            | 359.1 (4.4)   | 346.8 (3.3)    | 24.8 (2.8)   | 4.5 (0.5) | 9.8 (0.8)  | 7.1 (0.5)      | 5.3 (0.9) |
| Exercise                    | GUA | Block 1  | 1311.2 (35.4)    | 193.7 (15.8)    | 338.7 (7.9)            | 370.4 (8.7)   | 354.6 (6.3)    | 31.7 (6.4)   | 5.8 (1.1) | 10.5 (1.5) | 8.2 (1.0)      | 4.6 (1.8) |
|                             |     | Block 2  | 1249.9 (40.4)    | 176.5 (13.1)    | 336.8 (7)              | 365.8 (7.9)   | 351.3 (5.7)    | 29 (5.6)     | 3.8 (0.9) | 13.3 (2.3) | 8.6 (1.4)      | 9.5 (2.6) |
|                             |     | Block 3  | 1281.1 (40.2)    | 170.5 (13.2)    | 326.9 (7.9)            | 360.1 (7.6)   | 343.5 (6.0)    | 33.2 (5.4)   | 3.0 (0.7) | 12.0 (1.6) | 7.5 (1.1)      | 9.0 (2.8) |
|                             |     | Total    | 1280.7 (22.2) ■  | 180.2 (8.1) ■   | 334.1 (4.4) ■          | 365.4 (4.6) ● | 349.8 (3.4)    | 30.0 (3.3) ● | 4.2 (0.6) | 11.9 (1.1) | 8.1 (0.7)      | 7.7 (1.2) |
|                             |     | Block 1  | 1331.0 (20.0) \$ | 191.3 (7.4) \$  | 336.9 (4.1)            | 365.5 (4.4)   | 351.2 (3.2) \$ | 28.4 (2.9)   | 5.7 (0.6) | 10.2 (0.7) | 8.0 (0.5)      | 8.0 (0.5) |
|                             |     | Block 2  | 1269.8 (22.3) *  | 184.3 (8.5) \$  | 335.6 (3.8)            | 362.0 (4.0)   | 348.8 (2.9) \$ | 26.2 (2.6)   | 3.8 (0.4) | 10.5 (0.8) | 7.1 (0.5)      | 7.1 (0.5) |
|                             |     | Block 3  | 1273.0 (21.7) *  | 171.3 (6.6) *   | 325.9 (3.8)            | 356.6 (3.8)   | 340.9 (2.9)    | 30.5 (2.4)   | 4.1 (0.4) | 9.7 (0.7)  | 6.8 (0.4) ~    | 6.8 (0.4) |
|                             |     | Total    | 1292.2 (12.4)    | 182.9 (4.4)     | 332.9 (2.4)            | 361.4 (2.3)   | 347.2 (2.0)    | 29.95 (1.8)  | 4.5 (0.3) | 10.2 (0.4) | 7.4 (0.3)      | 5.6 (0.5) |

| Duration Production Task<br>mean (standard errors) |       |                 |               |               | Simon Task<br>mean (standard errors) |         |       |                       |             |       |                       |                       |
|----------------------------------------------------|-------|-----------------|---------------|---------------|--------------------------------------|---------|-------|-----------------------|-------------|-------|-----------------------|-----------------------|
|                                                    |       |                 |               |               | Reaction Time (ms)                   |         |       | Errors (%)            |             |       | Simon<br>Effect $\xi$ |                       |
|                                                    |       |                 |               |               | CO                                   | IN      | Total | Simon<br>Effect $\xi$ | CO          | IN    | Total                 | Simon<br>Effect $\xi$ |
| Nutritional<br>supplementa<br>tion                 | PL    | Block           |               | 197.9         | 336.0                                | 365.5   | 350.7 |                       | 4.7         | 9.8   | 7.2                   |                       |
|                                                    |       | 1               | 1370.7 (50.9) | (17.5)        | (8.7)                                | (9.7)   | (6.8) | 29.4 (5.7)            | (0.8)       | (1.2) | (0.8)                 | 5.1 (1.2)             |
|                                                    |       | Block           |               | 201.4         | 334.3                                | 359.8   | 347.1 |                       | 4.3         | 8.9 ( | 6.6                   |                       |
|                                                    |       | 2               | 1313.3 (56.8) | (24.0)        | (7.3)                                | (9.0)   | (6.0) | 25.5 (5.1)            | (0.9)       | 1.3)  | (0.9)                 | 4.6 (1.3)             |
|                                                    |       | Block           |               | 185.6         | 323.9                                | 357.6   | 340.8 |                       | 4.6         | 8.7   | 6.6                   |                       |
|                                                    |       | 3               | 1312.7 (58.6) | (15.9)        | (7.7)                                | (7.9)   | (6.0) | 33.7 (3.7)            | (0.6)       | (1.2) | (0.7)                 | 4.2 (1.5)             |
|                                                    |       |                 |               | 195.0         | 331.4                                | 361.1   | 346.2 | 29.5 (2.8)            | 4.5         | 9.1 ( | 6.8                   |                       |
|                                                    |       | Total           | 1332.2 (31.8) | (11.1)        | (4.6) ●                              | (5.1) ● | (3.6) | ●                     | (0.4)       | 0.7)  | (0.5)                 | 4.6 (0.8)             |
|                                                    |       | CH              | Block         |               | 186.8                                | 334.7   | 362.2 |                       | 7.0         | 10.4  | 8.7                   |                       |
|                                                    |       |                 | 1             | 1348.9 (44.2) | (14.5)                               | (8.1)   | (8.0) | 348.4 (6)             | 27.5 (6.3)  | (1.5) | (1.7)                 | (1.2)                 |
|                                                    | Block |                 |               |               | 334.4                                | 361.8   | 348.1 |                       | 3.3         | 9.5   | 6.4                   |                       |
|                                                    | 2     |                 | 1259.2 (41.0) | 171.6 14.6)   | (8.4)                                | (8.5)   | (6.1) | 27.5 (5.5)            | (0.8)       | (0.9) | (0.8)                 | 6.3 (1.0)             |
|                                                    | Block |                 |               | 161.5         | 324.2                                | 356.5   | 354.6 | 32.3                  | 4.4         | 9.8   | 7.1                   |                       |
|                                                    | O     | 3               | 1249.6 (39.4) | (11.8)        | (8.0)                                | (8.1)   | (6.1) | (5.5)                 | (0.9)       | (1.1) | (0.8)                 | 5.3 (1.2)             |
|                                                    |       |                 |               | 173.3 (7.9)   | 331.1                                | 360.2   | 345.6 | 29.1 (3.3)            | 4.9         | 9.9   | 7.4                   |                       |
| Total                                              |       | 1285.9 (24.3) ■ | ■ ▲           | (4.7) ●       | (4.7)                                | (3.5)   | ●     | (0.7)                 | (0.7)       | (0.5) | 5.0 (1.0)             |                       |
| CA                                                 |       | Block           |               | 187.0         | 338.0                                | 364.4   | 351.2 |                       | 5.1         | 10.3  | 7.7                   |                       |
|                                                    |       | F               | 1             | 1292.6 (24.5) | (11.8)                               | (8.5)   | (8.9) | (6.3)                 | 26.4 (5.12) | (0.9) | (1.3)                 | (0.9)                 |

|          |       |                  |               |         |           |          |             |            |       |         |            |           |
|----------|-------|------------------|---------------|---------|-----------|----------|-------------|------------|-------|---------|------------|-----------|
|          | Block |                  | 187.3         | 336.8   | 360.7     | 348.8    |             | 3.9        | 10.5  | 7.2     |            |           |
|          | 2     | 1255.9 (39.1)    | (14.3)        | (8.0)   | (6.7)     | (5.5)    | 23.9 (4.6)  | (0.9)      | (1.4) | (0.9)   | 6.6 (1.6)  |           |
|          | Block |                  | 167.7         | 328.4   | 352.4     | 340.4    |             | 4.6        | 8.5   | 6.5     |            |           |
|          | 3     | 1249.0 (31.5)    | (11.5)        | (7.4)   | (7.4)     | (5.5)    | 24 (4.7)    | (0.8)      | (1.4) | (0.9)   | 3.9 (1.7)  |           |
|          |       |                  | 180.7 (7.3)   | 334.4   | 359.1     | 346.8    |             | 4.5        | 9.8   | 7.1     |            |           |
|          | Total | 1265.8 (18.5) ■  | ■             | (4.6)   | (4.4)     | (3.3)    | 24.8 (2.8)  | (0.5)      | (0.8) | (0.5)   | 5.3 (0.9)  |           |
|          | GU    | Block            |               | 193.7   | 338.7     | 370.4    | 354.6       |            | 5.8   | 10.5    | 8.2        |           |
|          | A     | 1                | 1311.2 (35.4) | (15.8)  | (7.9)     | (8.7)    | (6.3)       | 31.7 (6.4) | (1.1) | (1.5)   | (1.0)      | 4.6 (1.8) |
|          |       | Block            |               | 176.5   |           | 365.8    | 351.3       |            | 3.8   | 13.3    | 8.6        |           |
|          |       | 2                | 1249.9 (40.4) | (13.1)  | 336.8 (7) | (7.9)    | (5.7)       | 29 (5.6)   | (0.9) | (2.3)   | (1.4)      | 9.5 (2.6) |
| Exercise | Block |                  | 170.5         | 326.9   | 360.1     | 343.5    |             | 3.0        | 12.0  | 7.5     |            |           |
|          | 3     | 1281.1 (40.2)    | (13.2)        | (7.9)   | (7.6)     | (6.0)    | 33.2 (5.4)  | (0.7)      | (1.6) | (1.1)   | 9.0 (2.8)  |           |
|          |       |                  | 180.2 (8.1)   | 334.1   | 365.4     | 349.8    | 30.0 (3.3)  | 4.2        | 11.9  | 8.1     |            |           |
|          | Total | 1280.7 (22.2) ■  | ■             | (4.4) ■ | (4.6) ●   | (3.4)    | ●           | (0.6)      | (1.1) | (0.7)   | 7.7 (1.2)  |           |
|          | Block |                  | 191.3 (7.4)   | 336.9   | 365.5     | 351.2    |             | 5.7        | 10.2  | 8.0     |            |           |
|          | 1     | 1331.0 (20.0) \$ | \$            | (4.1)   | (4.4)     | (3.2) \$ | 28.4 (2.9)  | (0.6)      | (0.7) | (0.5)   | 8.0 ( 0.5) |           |
|          | Block |                  | 184.3 (8.5)   | 335.6   | 362.0     | 348.8    |             | 3.8        | 10.5  | 7.1     |            |           |
|          | 2     | 1269.8 (22.3) *  | \$            | (3.8)   | (4.0)     | (2.9) \$ | 26.2 (2.6)  | (0.4)      | (0.8) | (0.5)   | 7.1 (0.5)  |           |
|          | Block |                  | 171.3 (6.6)   | 325.9   | 356.6     | 340.9    |             | 4.1        | 9.7   | 6.8     |            |           |
|          | 3     | 1273.0 (21.7) *  | *             | (3.8)   | (3.8)     | (2.9)    | 30.5 (2.4)  | (0.4)      | (0.7) | (0.4) ~ | 6.8 (0.4)  |           |
|          |       |                  | 332.9         | 361.4   | 347.2     |          | 4.5         | 10.2       | 7.4   |         |            |           |
|          | Total | 1292.2 (12.4)    | 182.9 (4.4)   | (2.4)   | (2.3)     | (2.0)    | 29.95 (1.8) | (0.3)      | (0.4) | (0.3)   | 5.6 (0.5)  |           |
